# Supplementary material
Source: PubMed Central journal article supplement (PMC4471443)
Supplement: supp_btt541_deckard2013_suppinfo.pdf [file supp_btt541_deckard2013_suppinfo.pdf]

SUPPLEMENTARY INFORMATION  
Design and Analysis of Large-Scale Biological Rhythm  
Studies: A Comparison of Algorithms for Detecting  
Periodic Signals in Biological Data

Anastasia Deckard<sup>1,3\*</sup>, Ron C. Anafi<sup>4</sup>, John B. Hogenesch<sup>5</sup>,  
Steven B. Haase<sup>2</sup>, John Harer<sup>3</sup>

<sup>1</sup>Program in Computational Biology and Bioinformatics, <sup>2</sup>Department of Biology, and  
<sup>3</sup>Department of Mathematics, Duke University, Durham, NC, USA; <sup>4</sup>Department of  
Medicine and <sup>5</sup>Department of Pharmacology, Institute for Translational Medicine and  
Therapeutics, University of Pennsylvania School of Medicine, Philadelphia, PA, USA.

| Analysis                            | Time  | # Samples         | Period        | Amp (peak-to-trough)  | Phase Shift    | Shapes                                                                                                             | Gauss. Noise Levels   | Profiles per Case | # Periods | Samples per Period |
|-------------------------------------|-------|-------------------|---------------|-----------------------|----------------|--------------------------------------------------------------------------------------------------------------------|-----------------------|-------------------|-----------|--------------------|
| <b>Noise, Resolution, and Shape</b> | 0-200 | <b>50, 25, 17</b> | 100           | 50 (100)              | 0 - per        | cos<br>cos2:<br>per= 0.3333 * per,<br>amp= 0.5 * amp,<br>pshift= (pshift + 0.083) % per<br>damp: 0.01<br>peak = 20 | <b>SD = 0, 25, 50</b> | 100               | 2         | 25, 12.5, 9        |
| <b>Recover Period</b>               | 0-200 | 50                | <b>50-150</b> | 50 (100)              | 0 - per        | trend lin: 0.5<br>trend exp: 0.027<br>flat<br>linear: (-0.5, 0.5)<br>(see functions table for details)             | <b>SD = 0, 25, 50</b> | 50                | 4 - 1.5   | 12.5 - 33          |
| <b>Recover Phase Shift</b>          | 0-200 | 50                | 100           | 50 (100)              | <b>0 - per</b> |                                                                                                                    | <b>SD = 0, 25, 50</b> | 50                | 2         | 25                 |
| <b>Recover Amplitude</b>            | 0-200 | 50                | 100           | <b>25-75 (50-150)</b> | 0 - per        |                                                                                                                    | <b>SD = 0, 25, 50</b> | 50                | 2         | 25                 |

Table S1: Synthetic data sets generated for each analysis. Each analysis used a set of synthetic data designed to capture behaviors of interest. Each set of synthetic data was made of several cases (shown in bold in the table).

| Shapes    | Function                                                                                                                                                                                                                                                                                       |
|-----------|------------------------------------------------------------------------------------------------------------------------------------------------------------------------------------------------------------------------------------------------------------------------------------------------|
| cos       | $\text{amp} * \cos(2 * \pi / \text{per} * t - \text{pshift} * (2 * \pi / \text{per}))$                                                                                                                                                                                                         |
| cos 2     | $\text{per2} = \text{per} * 0.3333$<br>$\text{amp2} = \text{amp} * 0.50$<br>$\text{pshift2} = (\text{pshift} + (\text{per2} * 0.25)) \% \text{per}$<br>$\text{amp} * \cos(2 * \pi / \text{per} * (t - \text{pshift}))$<br>$+ \text{amp2} * \cos(2 * \pi / \text{per2} * (t - \text{pshift2}))$ |
| damp      | $\text{amp} * \cos(2 * \pi / \text{per} * t - \text{pshift} * (2 * \pi / \text{per})) * \exp(-\text{damp} * t)$                                                                                                                                                                                |
| peak      | $\text{amp} * (-1 + 2 * \text{fabs}(\cos(\pi / \text{per} * t - \text{pshift} * (\pi / \text{per})))) * \text{peak}$                                                                                                                                                                           |
| trend exp | $\text{amp} * \cos(2 * \pi / \text{per} * (t - \text{pshift}))$<br>$+ \exp(\text{trendexp} * t)$                                                                                                                                                                                               |
| trend     | $\text{amp} * \cos(2 * \pi / \text{per} * t - \text{pshift} * (2 * \pi / \text{per}))$<br>$+ (\text{trend} * t)$                                                                                                                                                                               |
| flat      | 0                                                                                                                                                                                                                                                                                              |
| linear    | $(\text{slope} * t)$                                                                                                                                                                                                                                                                           |

Table S2: Functions of time (t) used to generate profiles. The types of periodic profiles are: cosine (cos), cosine two periods (cos 2), cosine damped (damp), cosine peaked (peak), cosine exponential trend (trend exp), and cosine linear trend (trend). The values for amplitude (amp), period (per), and phase shift (pshift) are selected from a uniform distribution within the defined minimum and maximum. For phase shift, the range is 0 to the period length. The values for the level of transformation for damp, peak, and trend are defined for a given set.

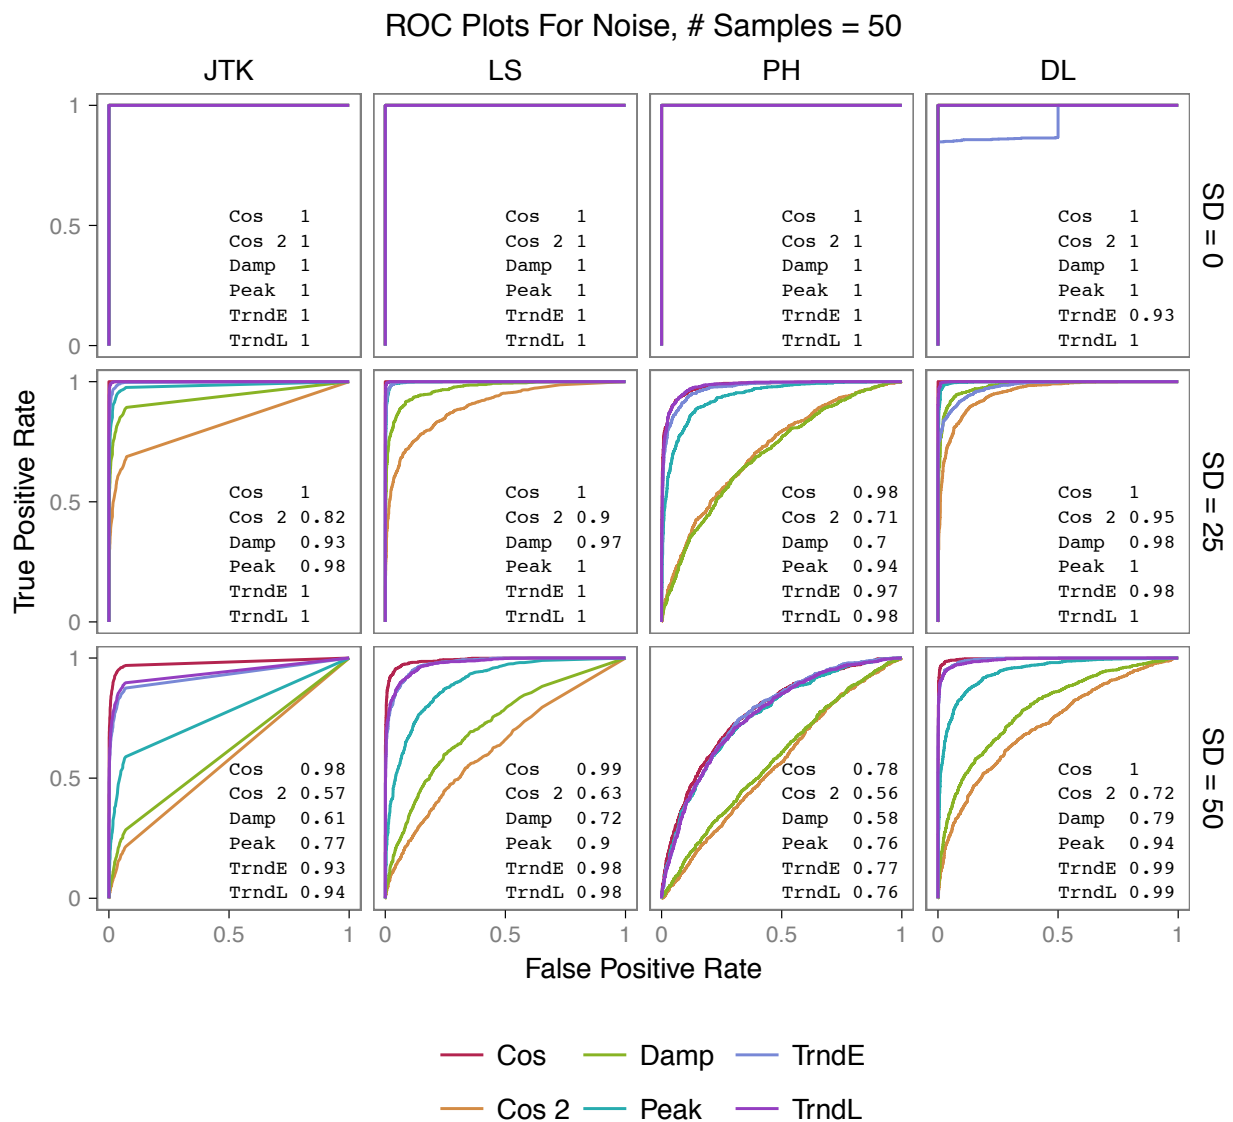

Figure S1: Algorithm performance on identifying periodic versus non-periodic profiles for different profile shapes and noise levels for 50 samples per profile, 1000 profiles per case. Receiver Operator Characteristic (ROC) plots shown with Area Under Curve (AUC). Performance degradation under increasing Gaussian noise with standard deviation = {0, 25, 50}. Used  $-\ln(p\text{-value or score})$ .

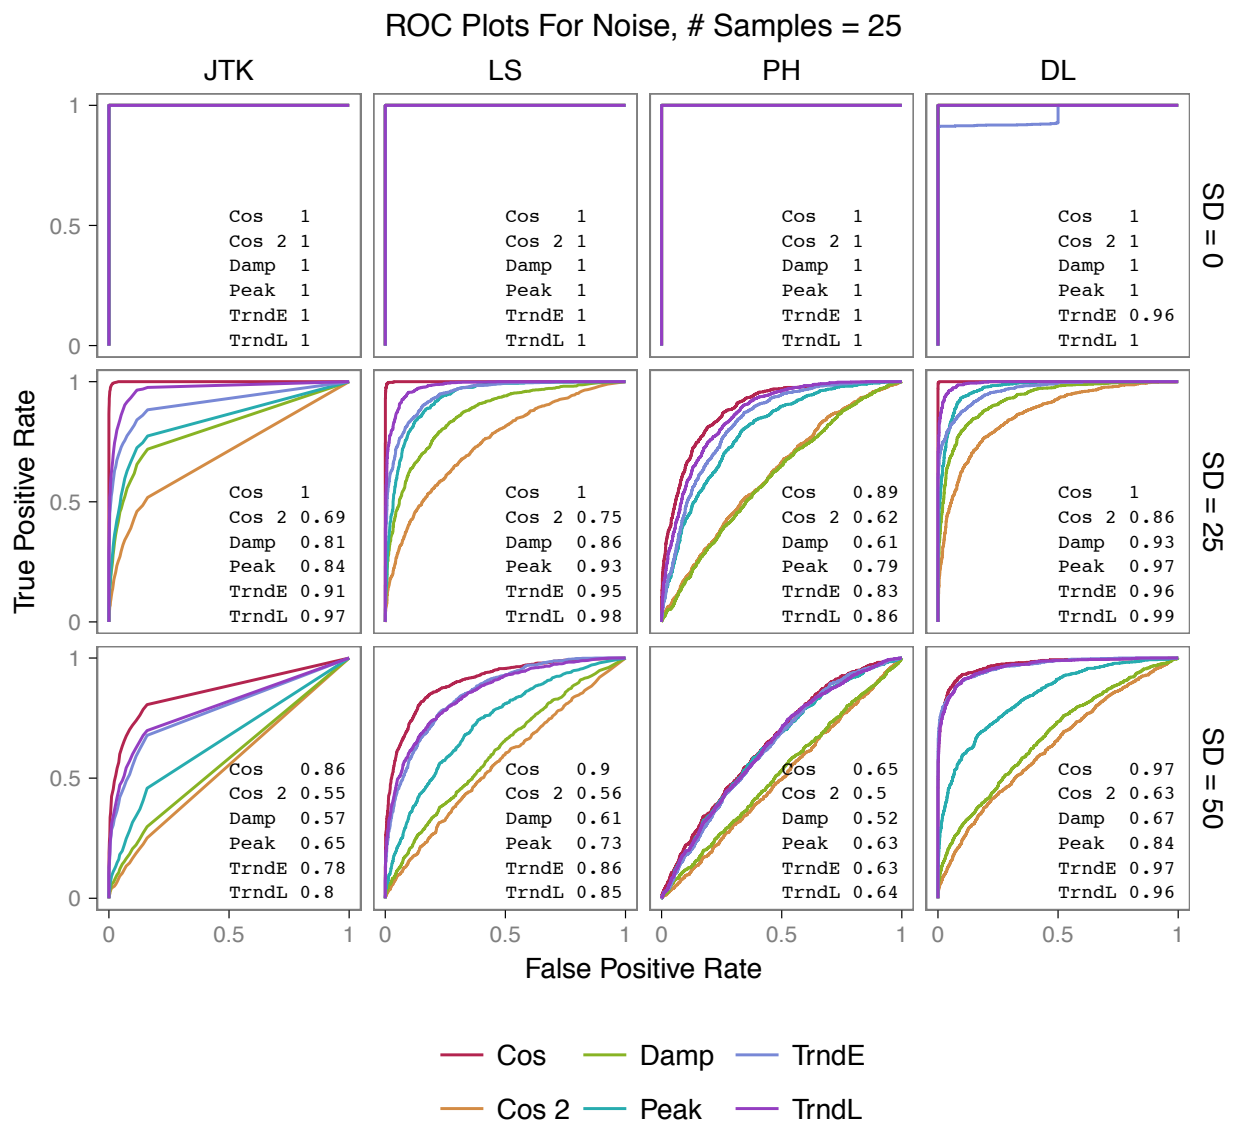

Figure S2: Algorithm performance on identifying periodic versus non-periodic profiles for different profile shapes and noise levels for 25 samples, 1000 profiles per case. Receiver Operator Characteristic (ROC) plots shown with Area Under Curve (AUC). Performance degradation under increasing Gaussian noise with standard deviation = {0, 25, 50}. Used  $-\ln(p\text{-value or score})$ .

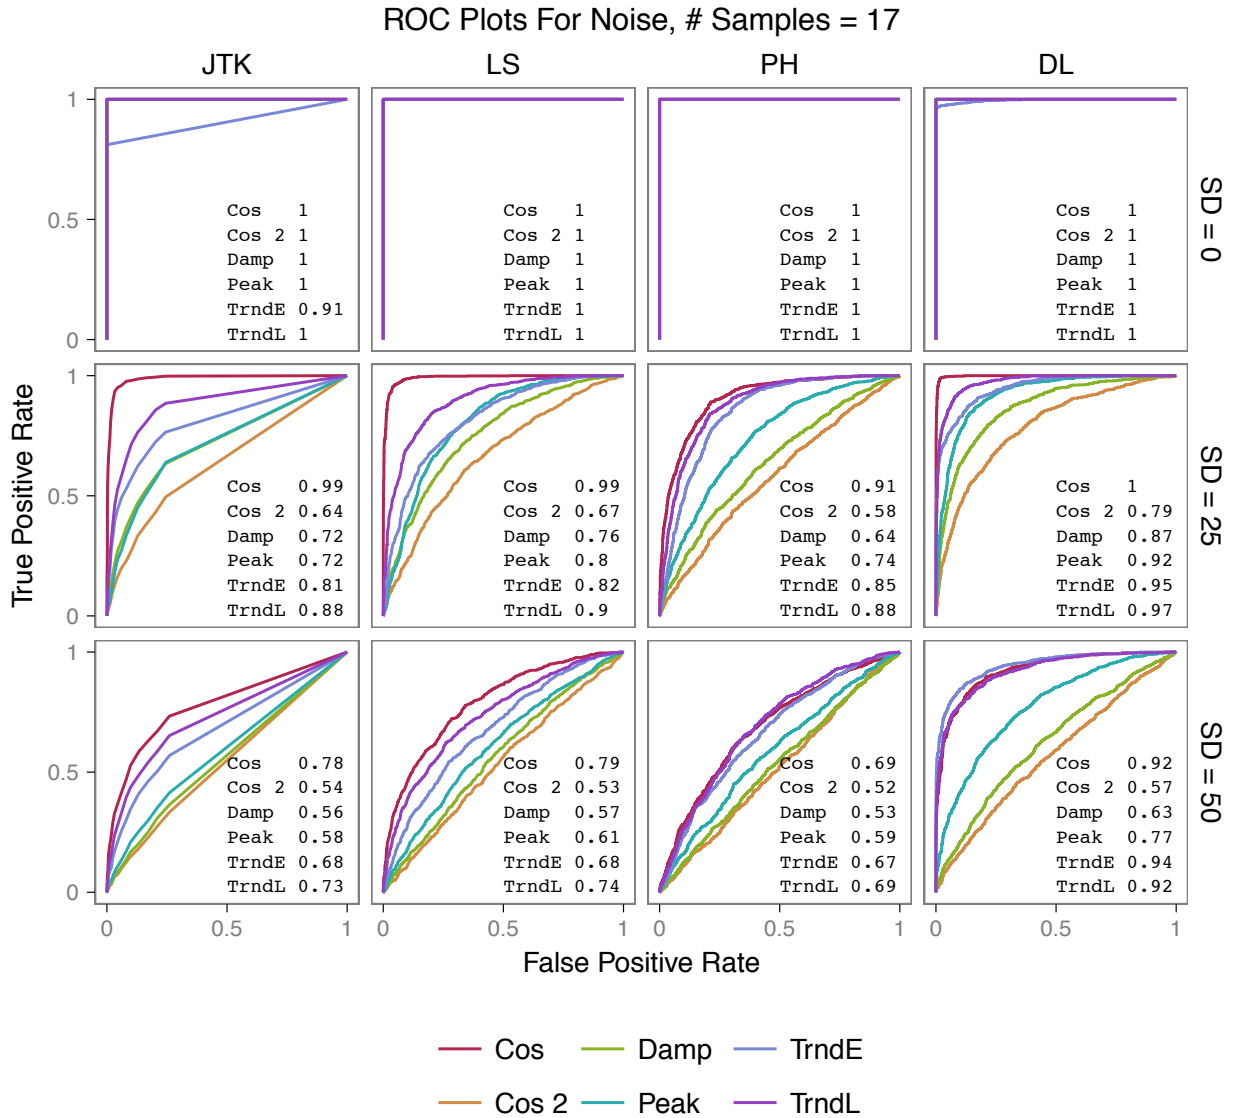

Figure S3: Algorithm performance on identifying periodic versus non-periodic profiles for different profile shapes and noise levels for 17 samples, 1000 profiles per case. Receiver Operator Characteristic (ROC) plots shown with Area Under Curve (AUC). Performance degradation under increasing Gaussian noise with standard deviation = {0, 25, 50}. Used  $-\ln(p\text{-value or score})$ .

|                    | <b># Samples for Two Periods, No Noise</b> |           |           |
|--------------------|--------------------------------------------|-----------|-----------|
|                    | <b>50</b>                                  | <b>25</b> | <b>17</b> |
| <b>LS p-value</b>  | 1.26E-09                                   | 1.48E-04  | 4.74E-03  |
| <b>JTK p-value</b> | 2.44E-49                                   | 1.47E-17  | 2.31E-09  |
| <b>PH score</b>    | 1.00E+00                                   | 1.00E+00  | 1.00E+00  |

Table S3: The effect of different sampling rates on p-values or scores. Scores are for the identical synthetic cosine curve with two full periods and no noise, but with number of samples = {50, 25, 17}. Both Lomb-Scargle and JTK CYCLE return p-values, and these methods and their statistical tests are affected by number of samples: a profile will receive lower p-values as the number of samples increases. Persistent Homology, however, does not use the number of samples when it computes scores; therefore, the score will not vary in relation to the number of time points.

## Score Distributions by # Samples and Noise SD

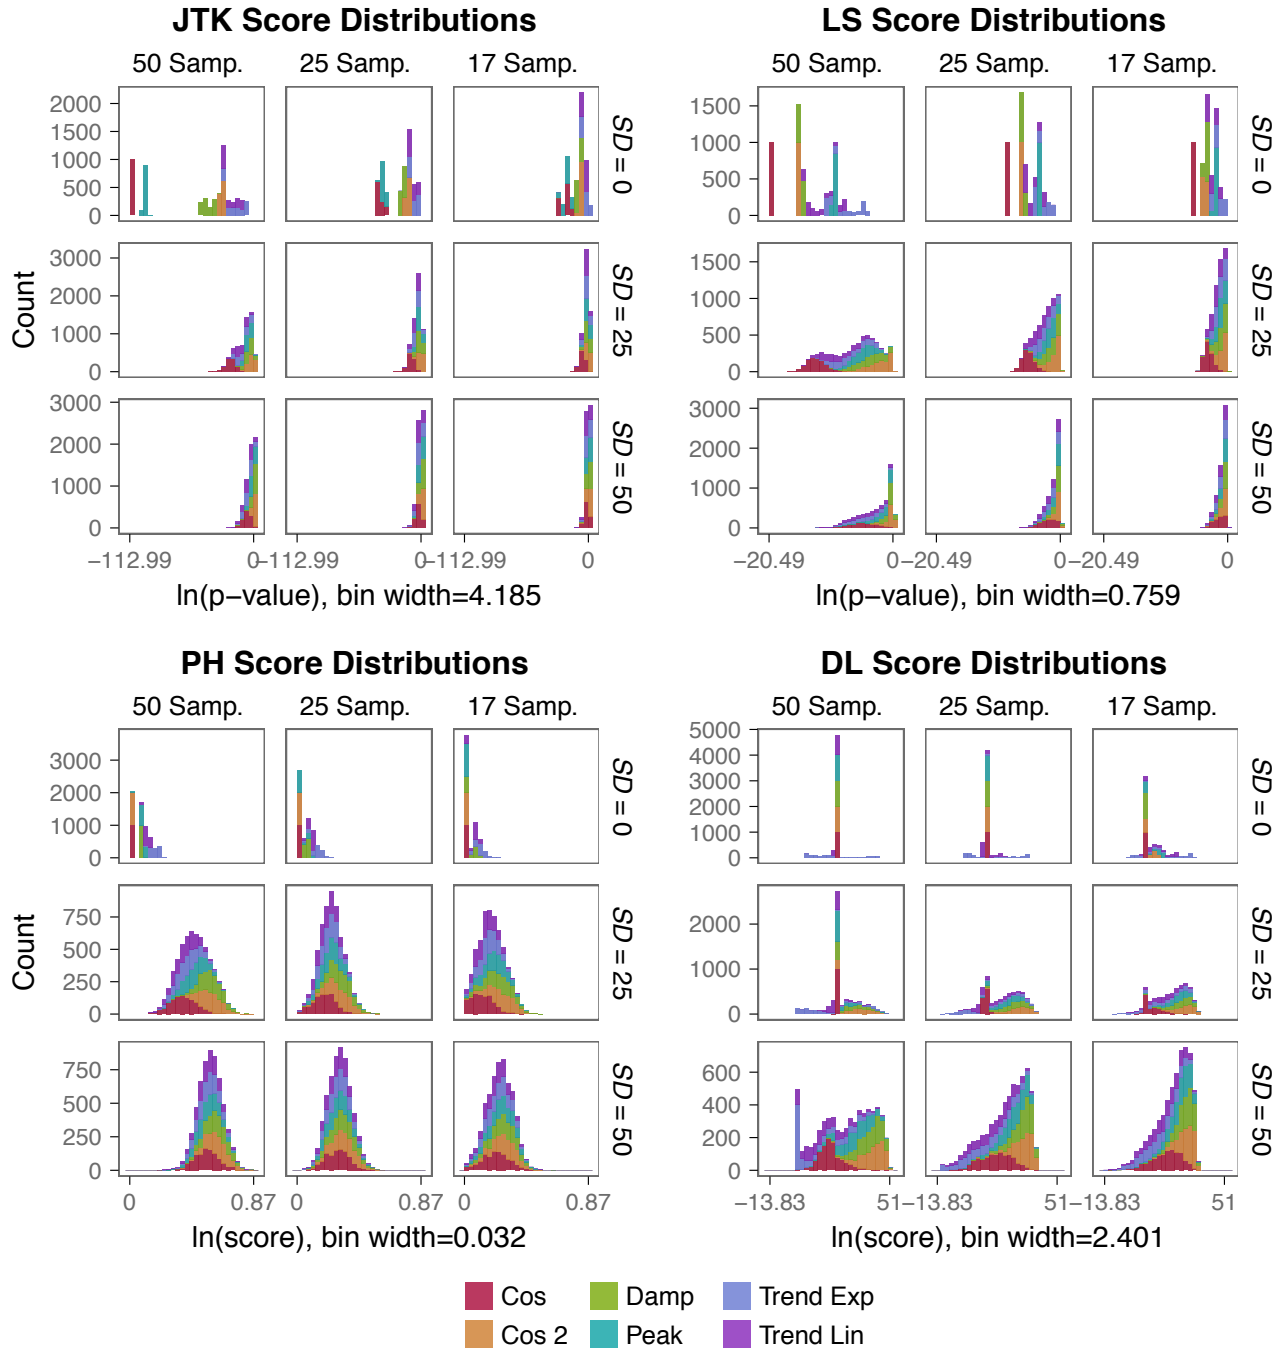

Figure S4: Algorithm biases for profile shapes. Histograms display scores returned for each different shape. Distributions of scores are by shape, with plots for data sets with difference number of samples = {50, 25, 17} and noise levels (Gaussian Noise SD = {0, 25, 50}). The same data set used in the ROC analysis was used. The x-axis shows the scores, log transformed, ranging from the lowest (best score) to the highest (worst score) returned by the algorithm. The y-axis shows the number of profiles receiving the score.



## Estimates of Phase Shift

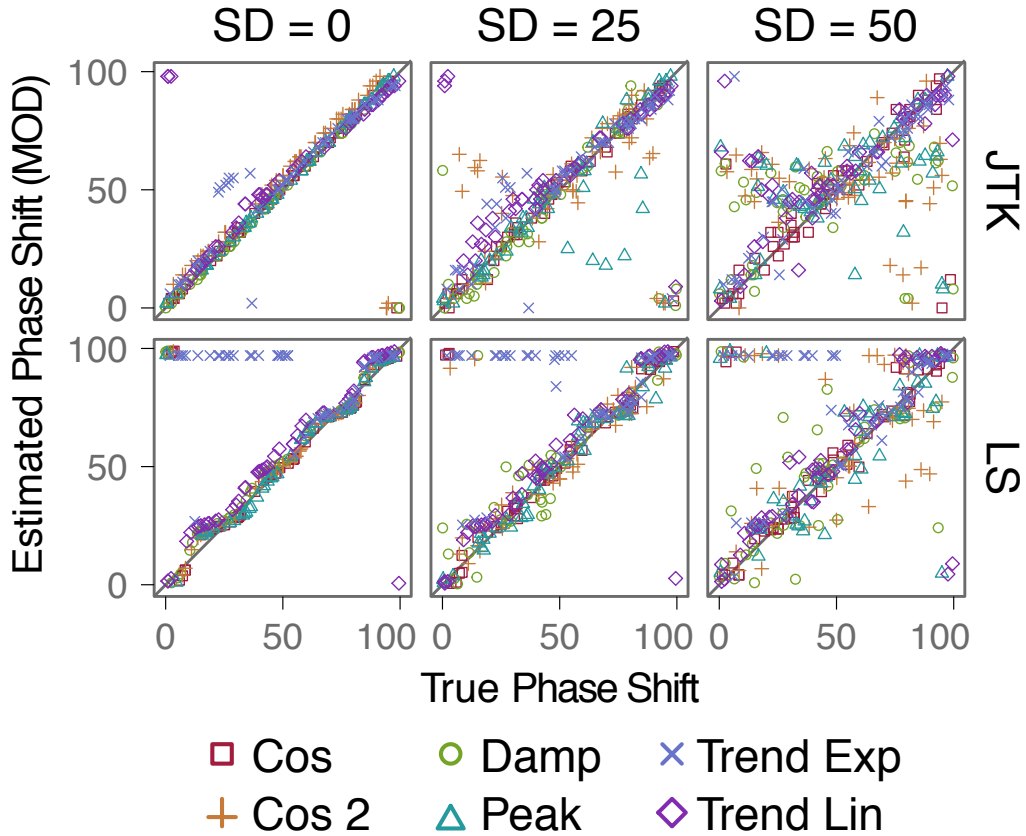

Figure S5: Phase estimates for different profile shapes and noise levels. Estimates for all profiles are shown. The  $\#$  samples = 50 for times 0-200 and Gaussian noise with  $SD = \{0, 25, 50\}$ . The black line indicates estimate = true. Plots of true phase shift versus estimated phase shift. The period was 100 and the phase shifts were 0-100, which covered every possible phase shift. The phase shift MODULO true period was used. The modulo operator forces numbers above a certain value to wrap around back to zero (e.g.  $120 \text{ MOD } 100 = 20$ ).

| Algorithm | Data Set              | Parameters                                                                        |
|-----------|-----------------------|-----------------------------------------------------------------------------------|
| LS        | Yeast Cell Cycle      | per_min: 64 per_max: 112 test_freq: 4                                             |
| JTK       | Yeast Cell Cycle      | per_min: 64 per_max: 112 interval: 16                                             |
| DL        | Yeast Cell Cycle      | num_permutations: 10000 period: 97.8                                              |
| PH        | Yeast Cell Cycle      | per_min: 64 per_max: 112 degree: 2 combine: 0<br>geom_factor: 1 amp_factor: 0     |
| LS        | Yeast Metabolic Cycle | per_min: 96 per_max: 504 test_freq: 4                                             |
| JTK       | Yeast Metabolic Cycle | per_min: 96 per_max: 504 interval: 24                                             |
| DL        | Yeast Metabolic Cycle | period: 300 num_permutations: 10000                                               |
| PH        | Yeast Metabolic Cycle | per_min: 96 per_max: 504 degree: 2 combine: 0<br>geom_factor: 1 amp_factor: 0     |
| LS        | Plant Root Clock      | per_min: 1.28 per_max: 12.16 test_freq: 4                                         |
| JTK       | Plant Root Clock      | per_min: 1.28 per_max: 12.16 interval: 0.32                                       |
| DL        | Plant Root Clock      | period: 6 num_permutations: 10000                                                 |
| PH        | Plant Root Clock      | per_min: 1.28 per_max: 12.16 degree: 2 combine: 0<br>geom_factor: 1 amp_factor: 0 |
| LS        | Mammal Circadian      | min_per: 20 max_per: 28 test_freq: 4                                              |
| JTK       | Mammal Circadian      | per_min: 20 per_max: 28 interval: 1                                               |
| DL        | Mammal Circadian      | num_permutations: 10000 period: 24                                                |
| PH        | Mammal Circadian      | per_min: 20 per_max: 28 degree: 2 combine: 0<br>geom_factor: 1 amp_factor: 0      |

Table S4: Running the Algorithms on Biological Data. For each algorithm and data set, the parameters used to run the algorithm are listed.

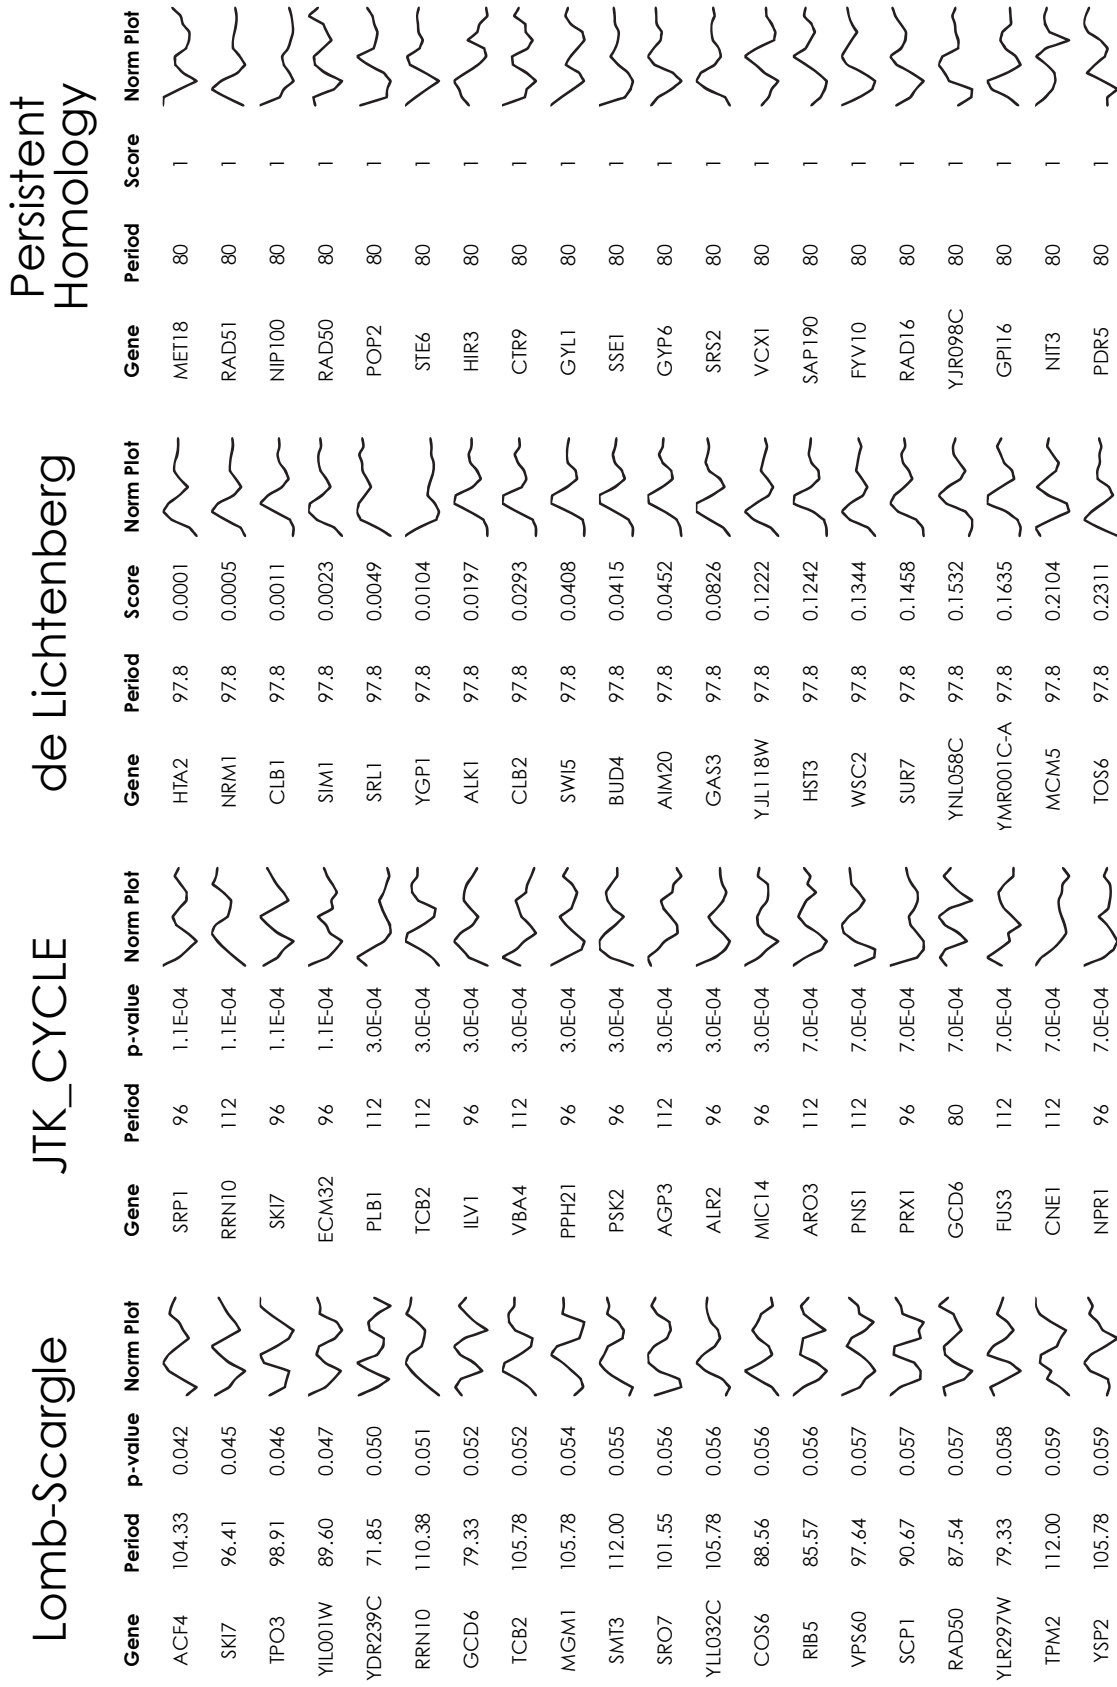

Figure S6: Top 20 probes for Yeast Cell Cycle data for each algorithm. PH returned 253 probes with the same top score.

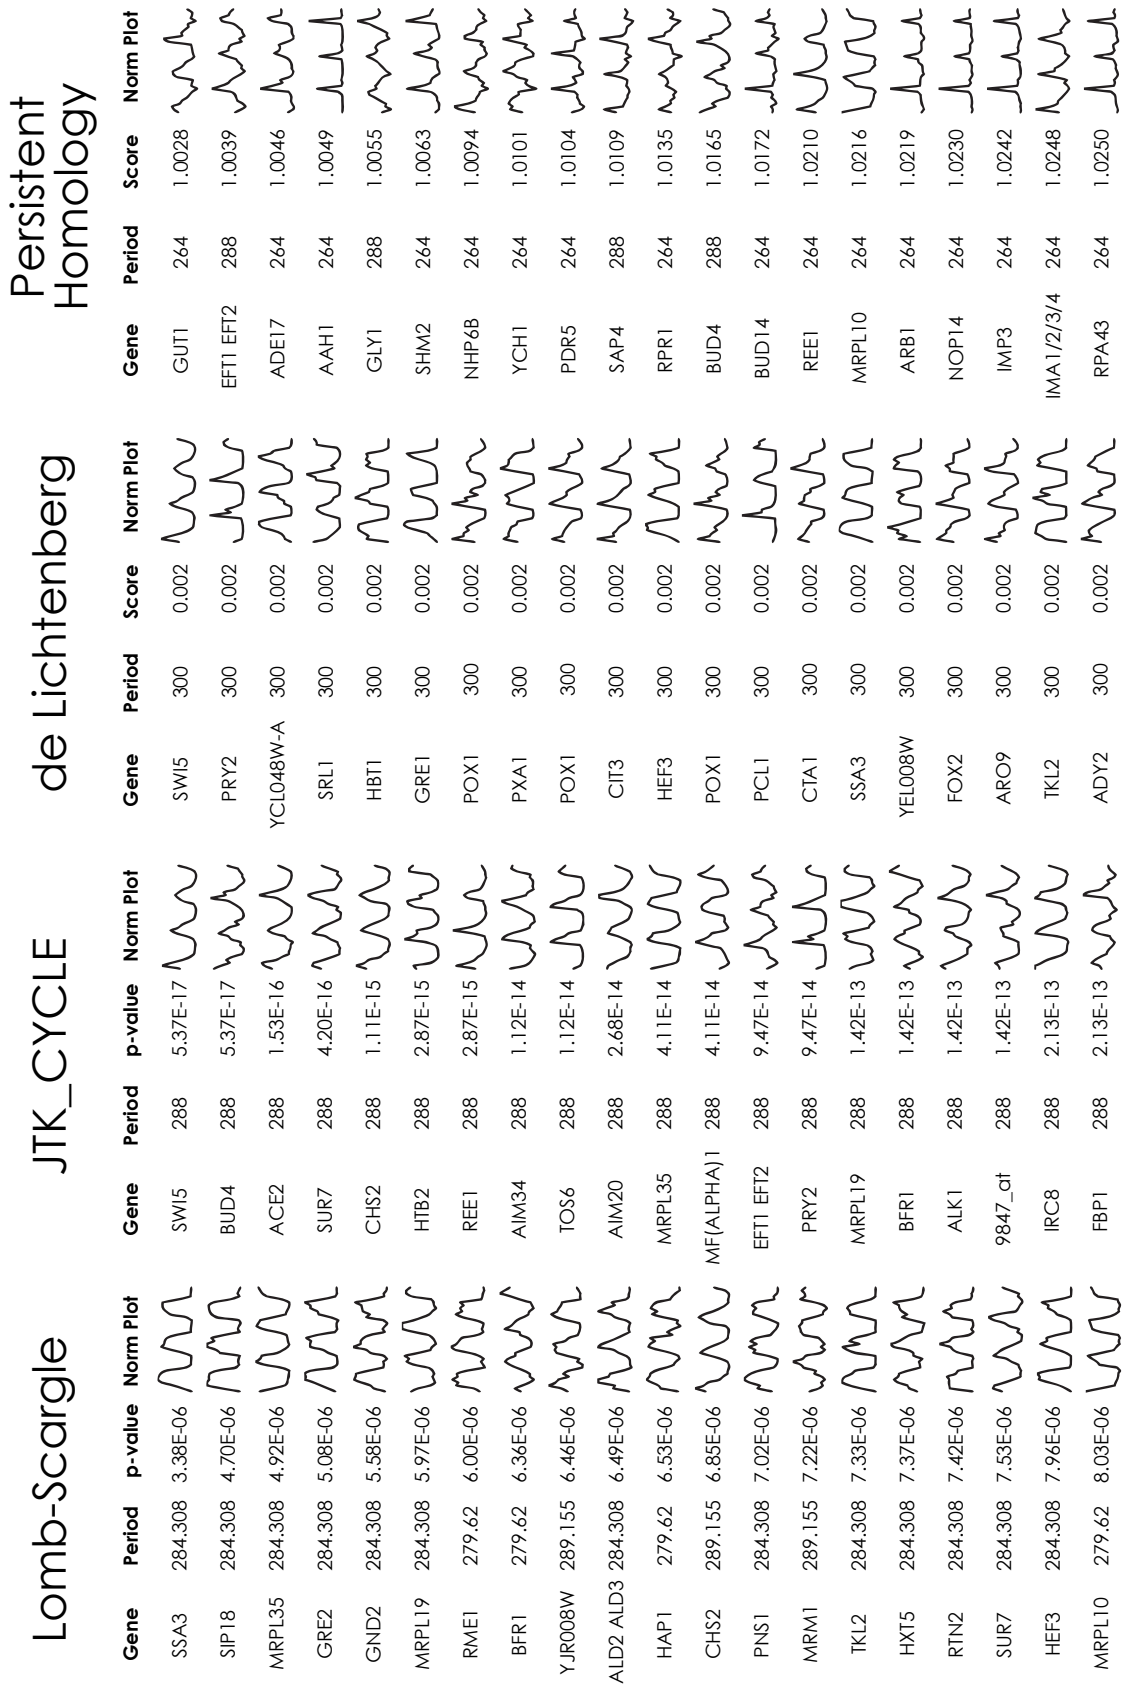

Figure S7: Top 20 probes for Yeast Metabolic Cycle data for each algorithm. DL returned 42 probes with the same top score.

# Lomb-Scargle

## JTK\_CYCLE

## de Lichtenberg

# Persistent Homology

| Gene      | Period | p-value  | Norm Plot | Gene       | Period | p-value  | Norm Plot | Gene      | Period | Score | Norm Plot | Gene       | Period | Score  | Norm Plot |
|-----------|--------|----------|-----------|------------|--------|----------|-----------|-----------|--------|-------|-----------|------------|--------|--------|-----------|
| AT3G52930 | 6.293  | 1.11E-05 |           | AT1G03820  | 6.08   | 8.47E-12 |           | RNS2      | 6      | 101.4 |           | PBC1       | 6.08   | 1.0495 |           |
| FAR7      | 6.293  | 1.27E-05 |           | CRR28      | 6.08   | 1.56E-11 |           | AT5G12470 | 6      | 101.4 |           | AT1G28400  | 10.56  | 1.0528 |           |
| AT1G03820 | 6.119  | 1.36E-05 |           | PAP21      | 6.4    | 2.84E-11 |           | PKT3      | 6      | 101.4 |           | DER1       | 5.76   | 1.0532 |           |
| AT4G15940 | 6.293  | 1.40E-05 |           | 263507_s_a | 6.4    | 3.82E-11 |           | UNE5      | 6      | 101.4 |           | AT1G63310  | 5.44   | 1.0589 |           |
| AT5G11310 | 6.293  | 1.43E-05 |           | 244917_at  | 6.4    | 5.12E-11 |           | KCR1      | 6      | 101.4 |           | AT3G03960  | 6.08   | 1.0594 |           |
| 255159_at | 6.293  | 1.46E-05 |           | AVP2       | 6.08   | 6.83E-11 |           | ACYB-2    | 6      | 101.4 |           | TOM40      | 6.08   | 1.0624 |           |
| CYP702A3  | 6.293  | 1.58E-05 |           | AT4G33390  | 6.08   | 6.83E-11 |           | TUA6      | 6      | 101.4 |           | AT5G11280  | 5.44   | 1.0637 |           |
| PAP21     | 6.119  | 1.73E-05 |           | AT3G13590  | 6.4    | 9.10E-11 |           | PBD2      | 6      | 101.4 |           | AT5G18970  | 5.44   | 1.0658 |           |
| AT4G05160 | 6.119  | 1.84E-05 |           | 257329_at  | 6.4    | 1.60E-10 |           | RALFL33   | 6      | 101.4 |           | AT4G36660  | 6.08   | 1.0693 |           |
| AAC1      | 6.119  | 1.84E-05 |           | AT5G11310  | 6.4    | 1.60E-10 |           | MEE58     | 6      | 101.4 |           | AT1G26640  | 5.76   | 1.0708 |           |
| AT3G04700 | 6.119  | 1.89E-05 |           | GLU2       | 6.08   | 2.11E-10 |           | AT4G16450 | 6      | 101.4 |           | AT2G16460  | 6.72   | 1.0753 |           |
| AT1G62070 | 6.119  | 1.89E-05 |           | ARF21      | 6.4    | 2.11E-10 |           | AT4G17100 | 6      | 101.4 |           | AT3G10780  | 6.08   | 1.0767 |           |
| 244911_at | 6.293  | 1.91E-05 |           | FAR7       | 6.4    | 2.78E-10 |           | AT4G15160 | 6      | 101.4 |           | AT5G10070  | 12.16  | 1.0790 |           |
| AT1G49380 | 6.119  | 1.92E-05 |           | AT5G48140  | 6.4    | 2.78E-10 |           | AT1G25275 | 6      | 101.4 |           | AT2G21390  | 6.08   | 1.0825 |           |
| AT5G28230 | 6.119  | 1.99E-05 |           | AT3G14480  | 6.08   | 2.78E-10 |           | AT5G08670 | 6      | 101.4 |           | AT1G55160  | 6.72   | 1.0827 |           |
| PMS1      | 5.955  | 1.99E-05 |           | PMS1       | 6.08   | 3.65E-10 |           | HTA10     | 6      | 101.4 |           | AT5G22270  | 5.44   | 1.0856 |           |
| AT6G055   | 6.293  | 2.05E-05 |           | AT5G39020  | 6.08   | 3.65E-10 |           | ATDAD1    | 6      | 101.4 |           | AT2G01220  | 6.72   | 1.0870 |           |
| AT2G06040 | 6.119  | 2.05E-05 |           | AT2G39510  | 6.4    | 4.78E-10 |           | RD21      | 6      | 101.4 |           | 252436_x_c | 6.08   | 1.0886 |           |
| AT3G08610 | 6.119  | 2.06E-05 |           | CYP702A3   | 6.4    | 4.78E-10 |           | EMB1144   | 6      | 101.4 |           | AT5G65440  | 1.6    | 1.0886 |           |
| FLP       | 6.293  | 2.07E-05 |           | AT1G18260  | 6.08   | 6.24E-10 |           | TUA3      | 6      | 101.4 |           | AT2G32580  | 5.44   | 1.0887 |           |

Figure S8: Top 20 probes for Plant Root Clock data for each algorithm. DL returned 530 probes with the same top score.

# Lomb-Scargle

# JTK\_CYCLE

# de Lichtenberg

# Persistent Homology

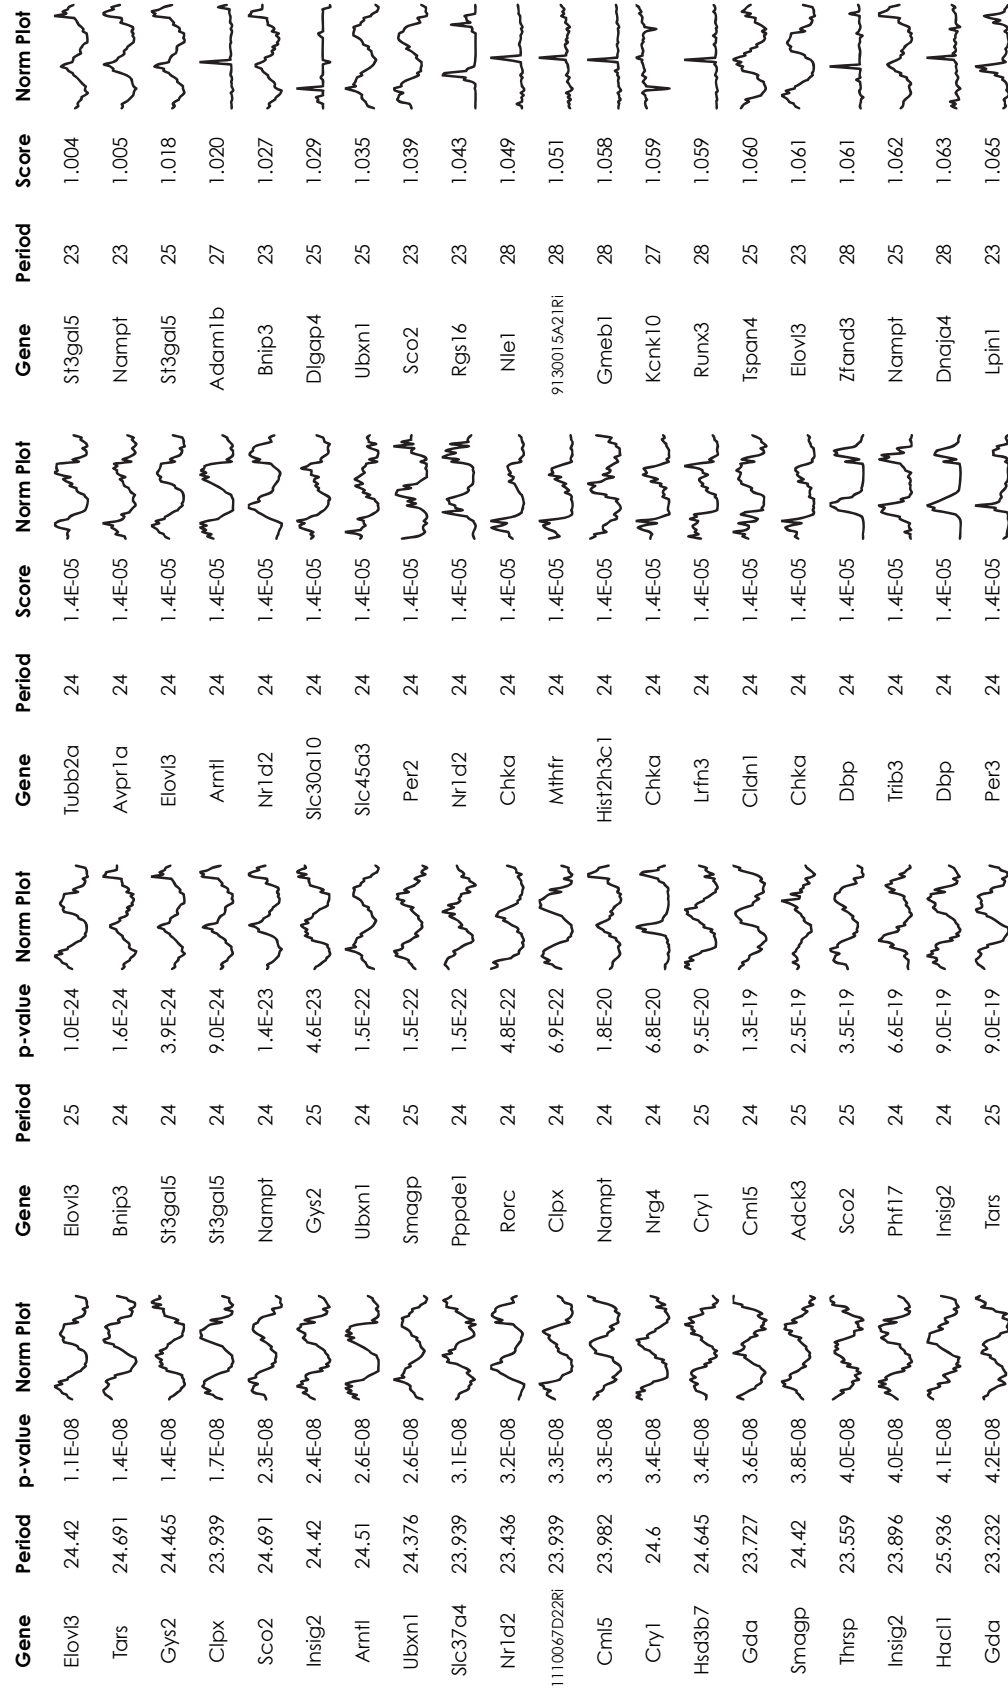

Figure S9: Top 20 probes for Mammal Circadian data for each algorithm. DL returned 52 probes with the same top score.

### Score Distributions for Yeast Cell Cycle

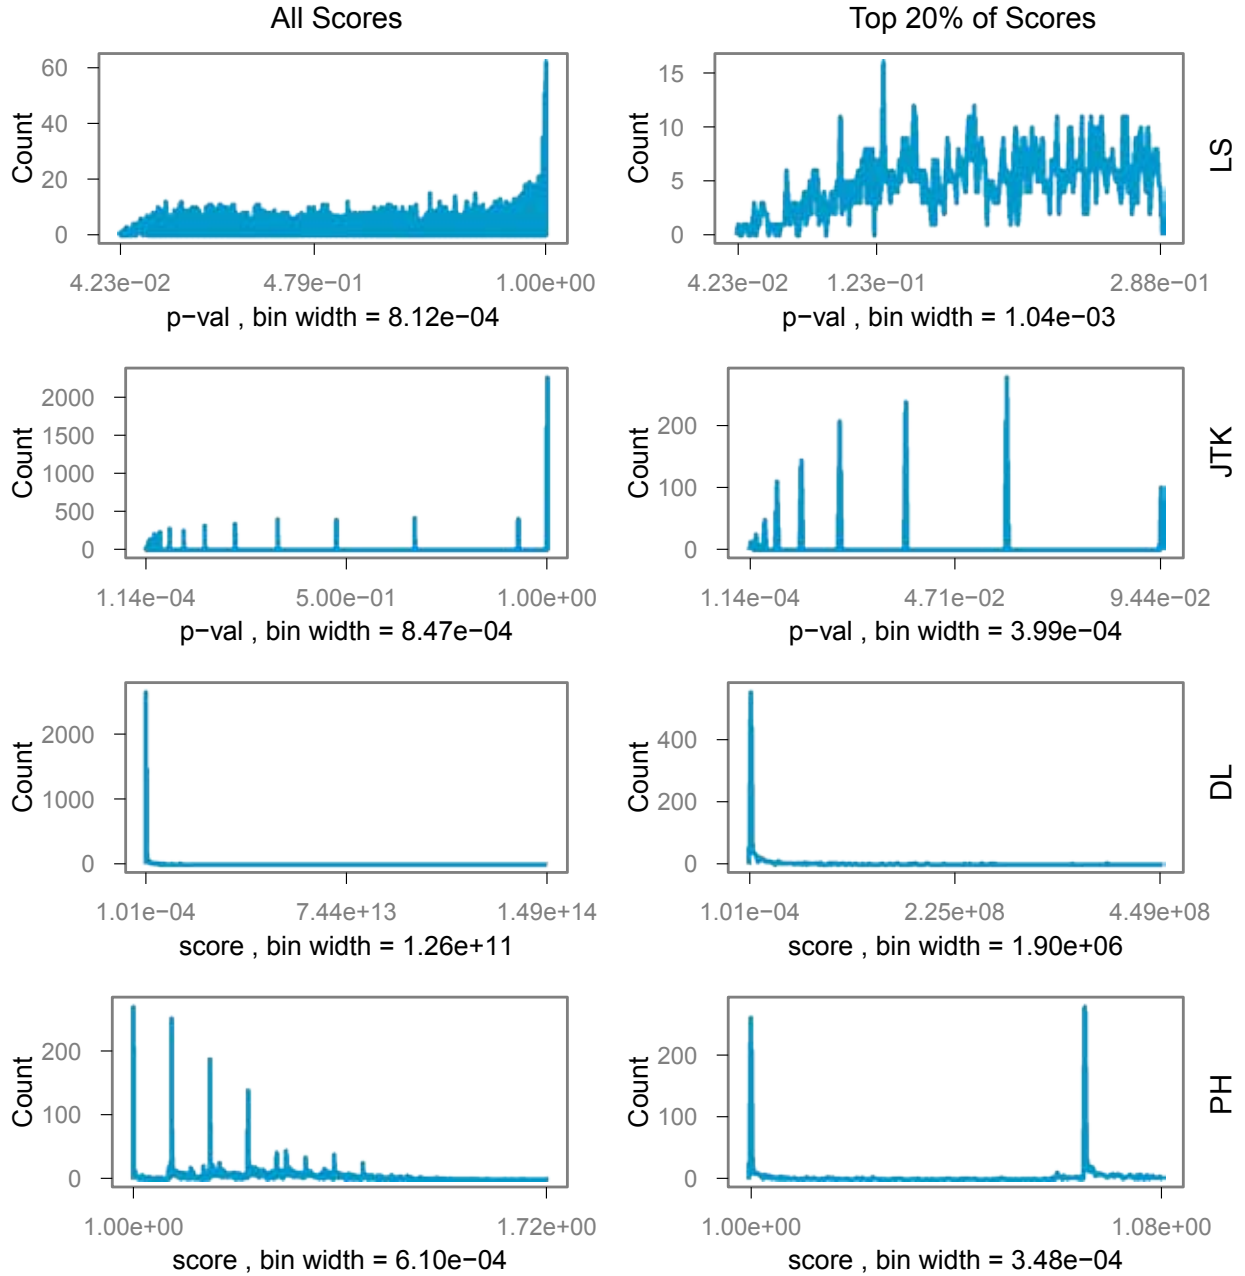

Figure S10: Score distributions for the Yeast Cell Cycle Data. Plots for each algorithm are in rows. Plots for all the scores are on the left, and plots only of the top 20% of scores are on the right. The frequency polygon function in ggplot2 was used to produce the plots in R, and the bin widths are shown in the x-axis title.

### Score Distributions for Yeast Metabolic Cycle

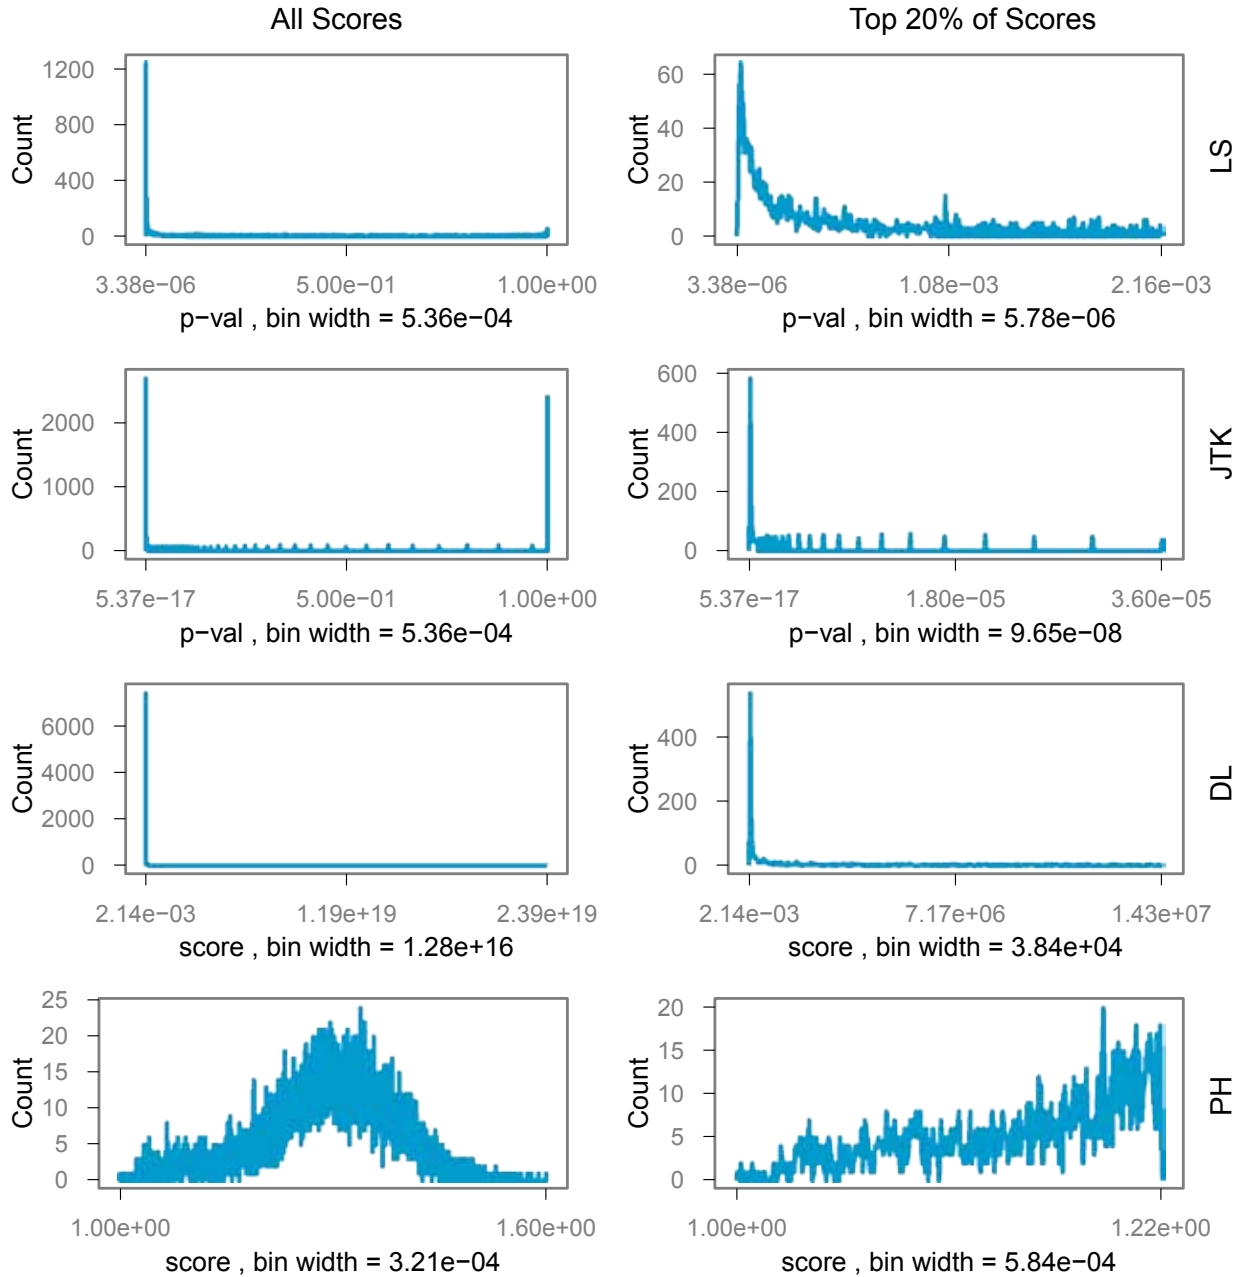

Figure S11: Score distributions for the Yeast Metabolic Cycle Data. Plots for each algorithm are in rows. Plots for all the scores are on the left, and plots only of the top 20% of scores are on the right. The frequency polygon function in ggplot2 was used to produce the plots in R, and the bin widths are shown in the x-axis title.



### Score Distributions for Arabidopsis Root Clock

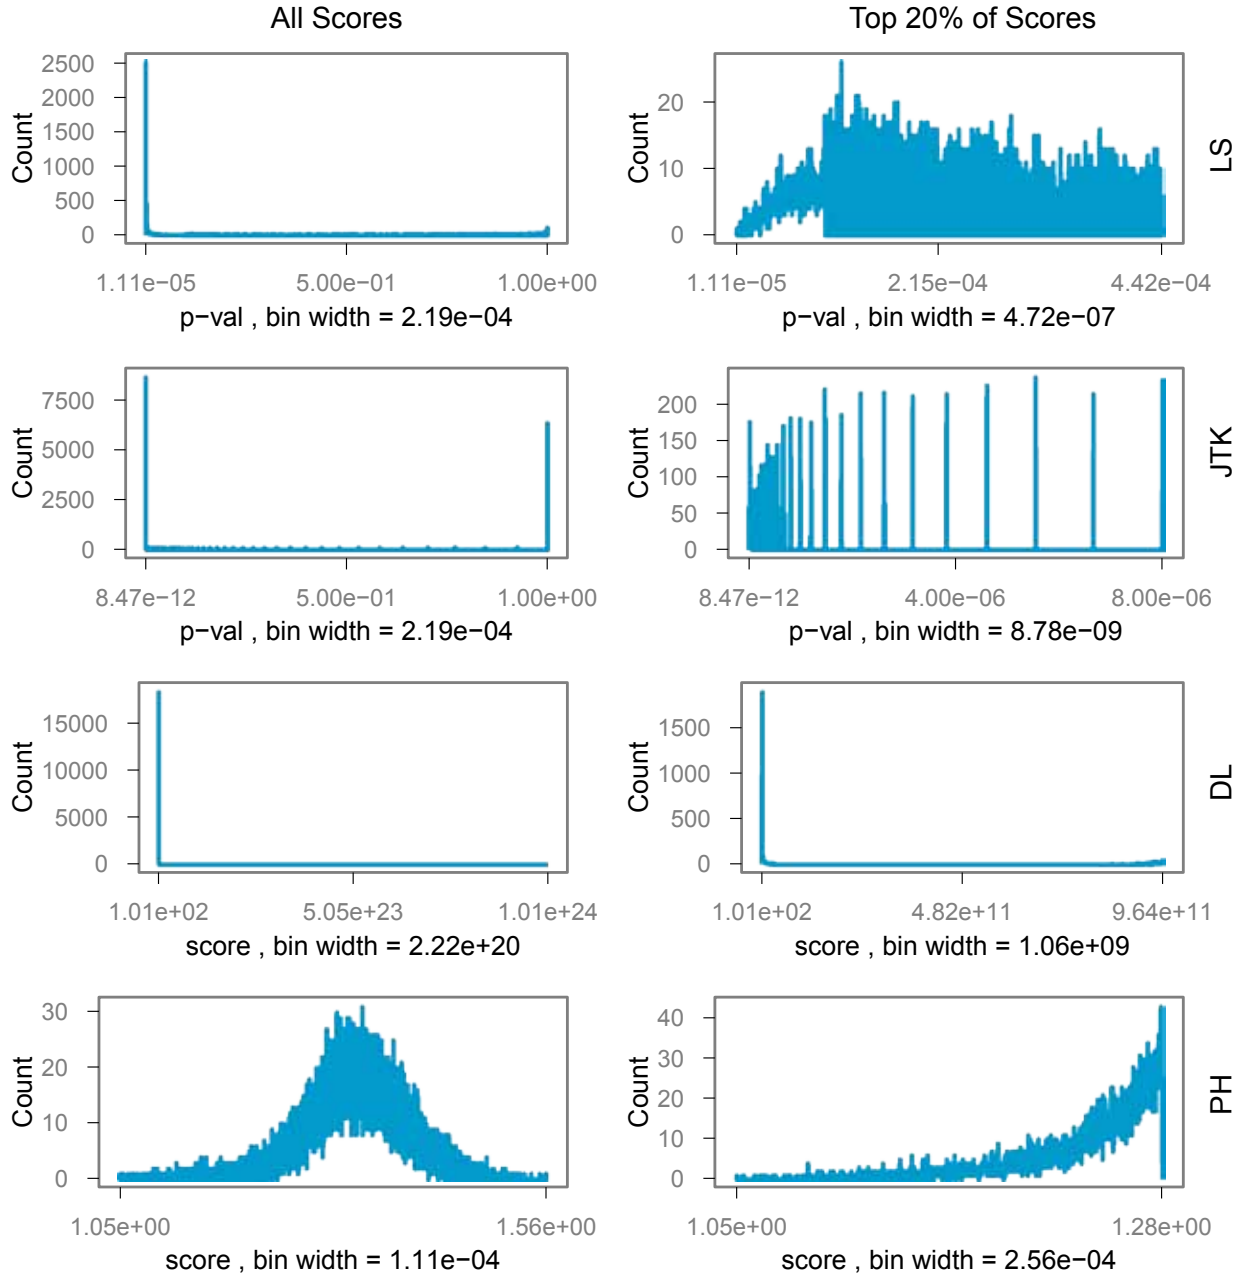

Figure S12: Score distributions for the Plant Root Clock Data. Plots for each algorithm are in rows. Plots for all the scores are on the left, and plots only of the top 20% of scores are on the right. The frequency polygon function in ggplot2 was used to produce the plots in R, and the bin widths are shown in the x-axis title.

### Score Distributions for Mammal Liver Circadian

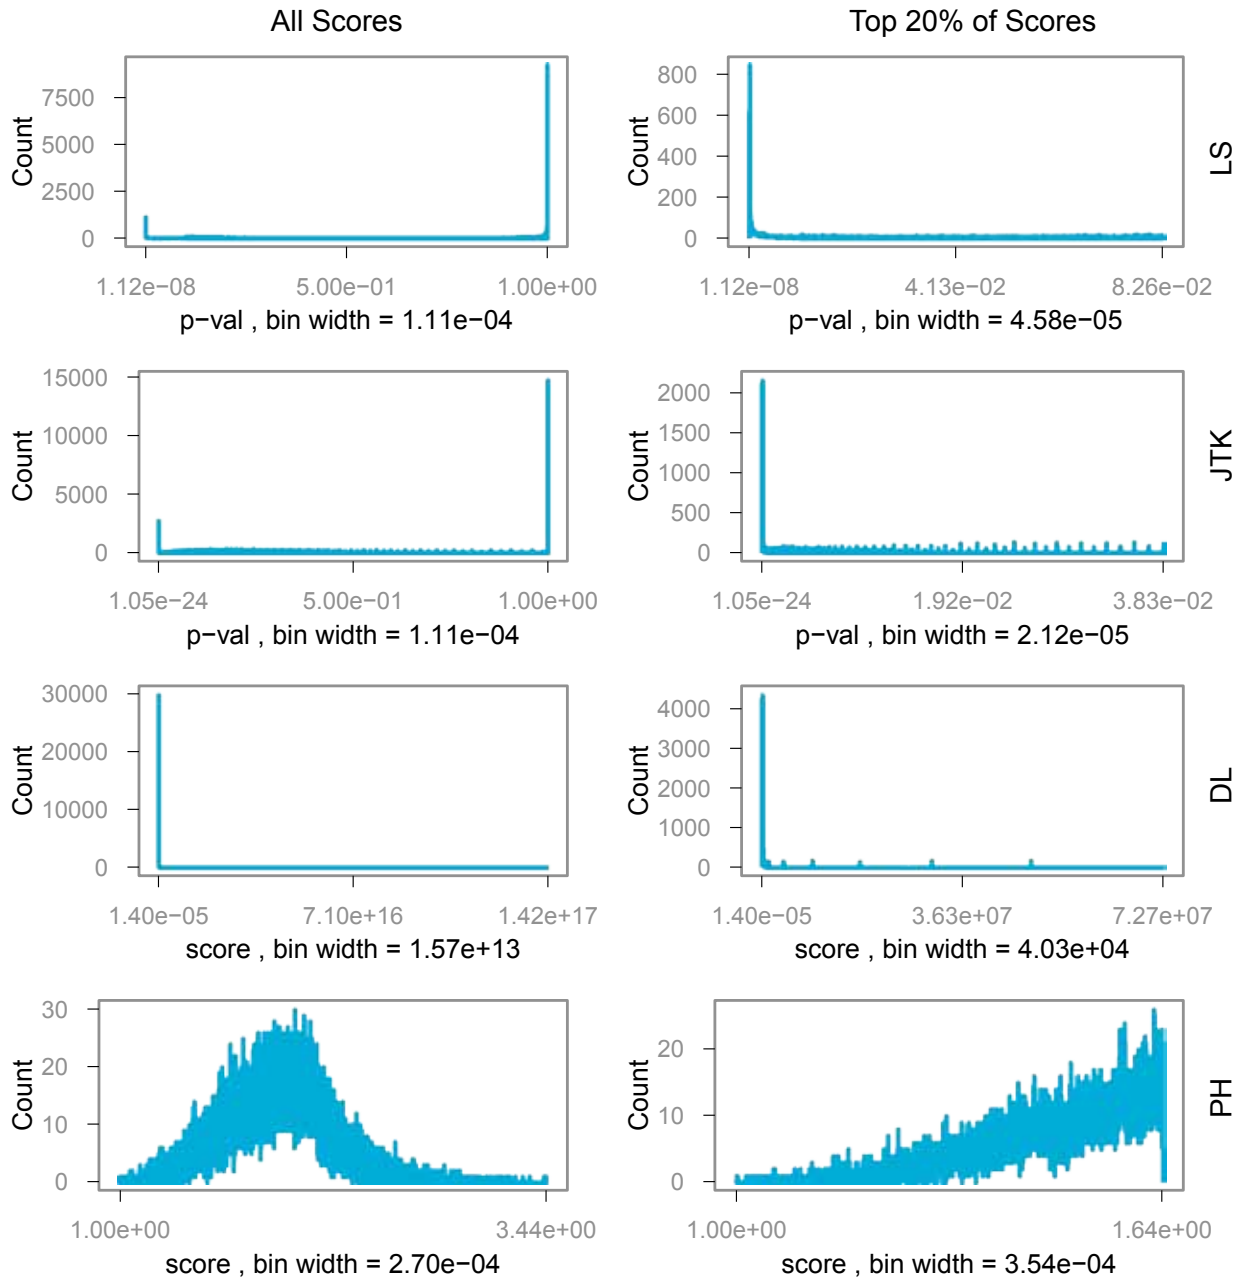

Figure S13: Score distributions for the Mammal Circadian Data. Plots for each algorithm are in rows. Plots for all the scores are on the left, and plots only of the top 20% of scores are on the right. The frequency polygon function in ggplot2 was used to produce the plots in R, and the bin widths are shown in the x-axis title.

## 1 Features of Algorithms

Here we cover some of the features of the algorithms, many of which are specified by the current implementation and not the algorithm. LS, JTK, and PH return estimates of the period from a range of periods searched, but DL only looks at one period. It is possible to run DL for each period of interest, but DL is slower than the other algorithms. LS and JTK also estimate the amplitudes and phase shifts, while DL and PH do not. The implementation of PH could be modified to detect phase shift by finding the persistent global maximum. Some algorithms can handle time series with missing time points and/or unevenly spaced time points. The implementation of PH will not process data sets with missing or uneven time points, but LS can as it was designed for this situation. JTK can handle missing time points, but its implementation currently only allows for specifying an even spacing between time points and then indicating which time points are missing. The algorithms' performance on handling missing or uneven time points was not evaluated. The features are summarized in Table S5.

| Features                          | JTK | LS | DL | PH |
|-----------------------------------|-----|----|----|----|
| Estimates significance (p-values) | y   | y  | n  | n  |
| Estimates period                  | y   | y  | n  | y  |
| Estimates amplitude               | y   | y  | n  | n  |
| Estimates phase shift             | y   | y  | n  | n  |
| Handles missing time points       | y   | y  | y  | n  |
| Handles uneven time points        | n*  | y  | y  | n  |

Table S5: A summary of the features provided by each algorithm. Yes (y) and No (n). \*JTK can handle missing time points, but does not directly handle unevenly spaced time points. The algorithms' performance on handling missing or unevenly spaced time points was not evaluated.

## 2 Run Time of Algorithms

When working with larger data sets, such as the circadian genome-wide RNA-Seq data (>200,000 features), the speed of the algorithms becomes important. To test their speed, we created synthetic data sets containing 100, 1k, 10k, or 100k profiles and having 10, 20, 40, or 80 samples. The profiles had two periods, with peak-to-trough amplitudes of 100, and Gaussian noise with standard deviation = 25. The algorithms were modified to suppress graphical output, but still write all results to files. Each data set was run twice through each algorithm and their times were averaged. The average run times (Table S6, Figure S14) were used to explore the growth of the run time.

A run time with a set input (for a given number of genes and number of samples) reflects the performance of the selected language and implementation in addition to the efficiency of an algorithm. PH was written in C++ while LS and JTK were written in R; an algorithm implemented in C++ is expected to run faster than the same algorithm implemented in R. As we deal with increasingly larger data sets, another concern is how

the run time scales as the size of the input increases. This is dependent on the number of steps an algorithm must perform for each input, or how efficient the algorithm is.

To explore how the algorithm scales as the size of the input increases, we show the running time as the number of samples or number of genes increases (Figure S14). For increasing numbers of genes, the execution times of the algorithms were approximately linear. For increasing numbers of samples, LS had sub-linear increase in execution time for up to 80 samples; e.g. twice as many samples took less than twice as long to run. However, JTK and PH both exhibited above linear growth for 20 to 40 and 40 to 80 samples.

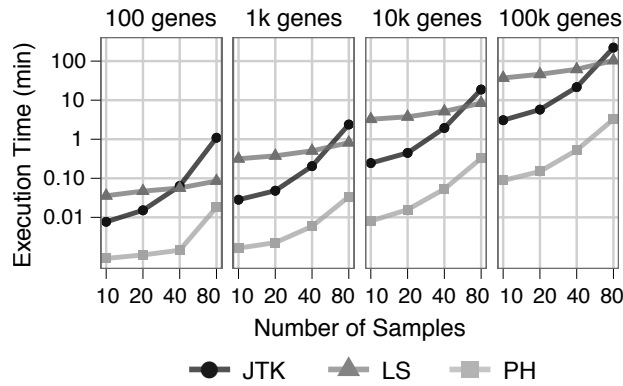

Figure S14: Relationship between algorithm run time and sample density, for several numbers of gene expression profiles. Run times are shown for JTK, LS, and PH.

### JTK Execution Times (minutes)

|           |    | # Genes |        |         |          |
|-----------|----|---------|--------|---------|----------|
|           |    | 100     | 1000   | 10000   | 100000   |
| # Samples | 10 | 0.0077  | 0.0283 | 0.2451  | 3.0718   |
|           | 20 | 0.0151  | 0.0480 | 0.4459  | 5.7297   |
|           | 40 | 0.0637  | 0.2045 | 1.9401  | 21.5390  |
|           | 80 | 1.0897  | 2.3810 | 18.7047 | 221.3169 |

### LS Execution Times (minutes)

|           |    | # Genes |        |        |          |
|-----------|----|---------|--------|--------|----------|
|           |    | 100     | 1000   | 10000  | 100000   |
| # Samples | 10 | 0.0357  | 0.3159 | 3.2490 | 36.9739  |
|           | 20 | 0.0469  | 0.3752 | 3.7451 | 45.9281  |
|           | 40 | 0.0564  | 0.5041 | 5.1495 | 61.6099  |
|           | 80 | 0.0851  | 0.8154 | 8.4007 | 103.5927 |

### PH Execution Times (minutes)

|           |    | # Genes |        |        |        |
|-----------|----|---------|--------|--------|--------|
|           |    | 100     | 1000   | 10000  | 100000 |
| # Samples | 10 | 0.0009  | 0.0016 | 0.0081 | 0.0878 |
|           | 20 | 0.0011  | 0.0023 | 0.0157 | 0.1496 |
|           | 40 | 0.0014  | 0.0059 | 0.0531 | 0.5241 |
|           | 80 | 0.0182  | 0.0338 | 0.3258 | 3.2279 |

Table S6: Run times on data sets with different numbers of samples and probes. Times in minutes for the algorithms to run. Rows are number of samples, and columns are number of genes that were run. Each time is an average from two runs on the same computer.

### 3 Algorithms

Lomb-Scargle (Lomb, 1976; Scargle, 1982): A set of sinusoidal signals that cover a range of periods are compared to the time series to generate a measure of correspondence. The significance of each of these is calculated, and the period of the most significant fit is returned. The explanation of this method in Scargle (1982) and Glynn *et al.* (2006) is recommended. The R-implementation was from (Glynn *et al.*, 2006). This implementation uses the Lomb-Scargle normalized periodogram as defined in Press and Rybicki (1989).

JTK\_CYCLE (Hughes *et al.*, 2010): A set of profiles (user-defined, the default is sinusoidal) is generated to cover a range of periods and phase shifts. A pair-wise comparison of all points in a profile calculates whether they are increasing or decreasing in relation to one another. The increasing/decreasing pattern of the time series is then compared to the increasing/decreasing pattern of each reference profile to determine the statistical significance of the correlation. It uses the Jonckheere-Terpstra test and Kendall's tau to compute the significance. The period and phase shift for the reference profile with the most significant correlation (or an average if there are more than one) is Bonferroni-adjusted for multiple testing and returned. The implementation was in R from the author of the paper.

de Lichtenberg (de Lichtenberg *et al.*, 2005): To measure the significance of periodicity, a background distribution is generated by creating a set of random profiles by permuting a given profile's expression values. The p-value is the proportion of permuted profiles with Fourier score at least as large as the original profile's observed Fourier score. For the significance of regulation, the gene expression profile is compared to a set of random profiles generated by selecting a value from a randomly selected gene profile at each time point. The p-value for regulation (amplitude) is measured as the proportion of permuted profiles with standard deviation at least as large as a time series' observed standard deviation. The implementation in R from (Orlando *et al.*, 2008) was used (see Acknowledgements).

Persistent Homology (Cohen-Steiner *et al.*, 2010): PH normalizes the data from 0 to 1, and then pairs (in a subtle way) minima and maxima of a time series, treated as a function on the circle. A measure is obtained by summing the differences (persistence) between the maximum and the minimum of each pair. If there is only one minimum and maximum pair, the measure is one and is considered to be a perfect oscillation; thus the method is insensitive both to amplitudes and sinusoidal shape. Additional oscillations in the time series will create more minimum-maximum pairs, which will increase the score, indicating a less perfect profile. To determine period, sliding windows with widths equal to the range of periods are used; the period with the lowest score is returned. The last author of (Cohen-Steiner *et al.*, 2010) provided an implementation of the algorithm written in C++ (see Acknowledgements).

### 4 Data Sets

Yeast Cell Cycle Data (Orlando *et al.*, 2008): Wild-type strains of *S. cerevisiae* (derivatives of BF264-15Dau) were synchronized by elutriation. Samples were taken at 16 minute intervals starting at 30 minutes and ending at 254 minutes. There were two replicates in this experiment, for our analysis we used only the first replicate. The period for the cell cycle in this experiment is estimated to be 77.1 minutes for mother cells and 118.5 minutes for daughter cells (length of normal cell cycle of 77.1 plus daughter specific phase

of 41.4). The samples cover a recovery period and roughly two cell cycles. However, there is a stress shock response during the recovery period; we therefore ignored the first 2 time points and looked only at the last 13 time points. This microarray data was from the Affymetrix Yeast Genome 2.0 Array and was processed using dChip. This data set contains 15 time points for 5,900 probes. The data was provided by the authors (GEO accession GSE8799).

Yeast Metabolic Data (Tu *et al.*, 2005): Diploids of *S. cerevisiae* strain CEN.PK were grown to a high density, briefly starved and then given low concentrations of glucose. Samples were taken approximately every 23-25 minutes (sampling was not even at all time points) starting at 3973 minutes and ending at 4837 minutes. We evened the sample times in the data by making the sampling at every 24 minutes. Any blanks in the data were filled with zeros. The period of the yeast metabolic cycle is estimated to be ~300 minutes, and this data set covers approximately three cycles. This microarray data was from the Affymetrix Yeast Genome S98 Array. This data set contains 36 time points and 9,335 probes. The data was downloaded from GEO (GEO accession GSE3431).

Plant Root Clock Data (Moreno-Risueno *et al.*, 2010): The roots could not be synchronized, so instead the chronological order of different roots was inferred by analyzing the reporter DR5:GUS expression by RT-PCR. We applied evenly spaced time points to approximate the inferred timing. The period of the root clock is estimated to be ~6 hours and this data set covers roughly two cycles. This microarray data was from the Affymetrix Arabidopsis ATH1 Genome Array. This data set contains 39 time points and 22,801 probes. . The data was provided by the authors (GEO accession GSE21611).

Mammalian Circadian Rhythm Data Hughes *et al.* (2009): Wild-type C57BL/6J mice were synchronized by entraining them to an environment with 12 h light and 12 h dark for one week. They were then placed into total darkness. Samples were taken from the liver every hour starting at 18 hours after the first subjective day and ending at 65 hours. The period of the circadian rhythm is ~24 hours and this data set covers two circadian cycles. This microarray data was from Affymetrix Mouse Genome 430 2.0 array and was processed using GCRMA. This data set contains 48 time points and 45,101 probes. The data was provided by the authors (GEO accession GSE11923).

## 5 Running the Algorithms on the Biological Data Sets

The period of the cell cycle in the wild-type yeast was estimated to be 77.1 minutes for mother cells and 118.5 minutes for daughter cells (Orlando *et al.*, 2008). As a simplification, we assumed the period length would be the average of the mother and daughter = 97.8 minutes. For LS, JTK, and PH a period range of 64-112 minutes was used. For DL, the period was 97.8 minutes.

The yeast metabolic cycle data was evaluated by LS, JTK, and PH with a period range of 96 to 504 minutes and by DL with a period of 300 minutes.

The plant root clock data set was evaluated by LS, JTK, and PH with a period range of 1.28 to 12.16 hours and by DL with a period of 6 hours.

The mammalian circadian data was evaluated by LS, JTK, and PH with a period range of 20 to 28 hours. For DL, the period was set to 24 hours.

## 6 Data Analysis & Plotting

The R package ROCR was used to compute ROC and AUC (Sing *et al.*, 2005). The results from synthetic data were plotted in R using the ggplot2 package (Wickham, 2009).

### References

- Cohen-Steiner, D., Edelsbrunner, H., Harer, J., and Mileyko, Y. (2010). Lipschitz Functions Have  $L_p$ -Stable Persistence. *Foundations of Computational Mathematics*, **10**(2), 127–139.
- de Lichtenberg, U., Jensen, L. J., Fausbøll, A., Jensen, T. S., Bork, P., and Brunak, S. (2005). Comparison of computational methods for the identification of cell cycle-regulated genes. *Bioinformatics*, **21**(7), 1164–1171.
- Glynn, E. F., Chen, J., and Mushegian, A. (2006). Detecting periodic patterns in unevenly spaced gene expression time series using Lomb-Scargle periodograms. *Bioinformatics*, **22**(3), 310–316.
- Hughes, M., Hogenesch, J. B., and Kornacker, K. (2010). JTK\_CYCLE: An Efficient Nonparametric Algorithm for Detecting Rhythmic Components in Genome-Scale Data Sets. *Journal of Biological Rhythms*, **25**(372), 372–380.
- Hughes, M. E., DiTacchio, L., Hayes, K. R., Vollmers, C., Pulivarthy, S., Baggs, J. E., Panda, S., and Hogenesch, J. B. (2009). Harmonics of circadian gene transcription in mammals. *PLoS genetics*, **5**(4), e1000442.
- Lomb, N. (1976). Least-squares frequency analysis of unequally spaced data. *Astrophysics and Space Science*, **39**, 447–462.
- Moreno-Risueno, M. A., Van Norman, J. M., Moreno, A., Zhang, J., Ahnert, S. E., and Benfey, P. N. (2010). Oscillating gene expression determines competence for periodic Arabidopsis root branching. *Science*, **329**(5997), 1306–1311.
- Orlando, D., Lin, C., Bernard, A., Wang, J., Socolar, J., Iversen, E., Hartemink, A., and Haase, S. (2008). Global control of cell-cycle transcription by coupled CDK and network oscillators. *Nature*, **453**(7197), 944–947.
- Press, W. H. and Rybicki, G. B. (1989). Fast algorithm for spectral analysis of unevenly sampled data. *Astrophysical Journal*, **338**, 277–280.
- Scargle, J. (1982). Studies in astronomical time series analysis. II-Statistical aspects of spectral analysis of unevenly spaced data. *Astrophysical Journal*, **263**, 835–853.
- Sing, T., Sander, O., Beerwinkler, N., and Lengauer, T. (2005). RocR: visualizing classifier performance in R. *Bioinformatics*, **21**(20), 7881.
- Tu, B., Kudlicki, A., Rowicka, M., and McKnight, S. (2005). Logic of the yeast metabolic cycle: temporal compartmentalization of cellular processes. *Science*, **310**(5751), 1152–1158.
- Wickham, H. (2009). *ggplot2: elegant graphics for data analysis*. Springer New York.
